# Supplementary material
Source: PubMed Central journal article supplement (PMC3140008)
Supplement: tlo0404_0212SD1.pdf [file tlo0404_0212SD1.pdf]

**Table W1.** Sequences of Primers Used in Real-time QPCRs.

| Gene         | Forward (5'–3')               | Reverse (5'–3')               |
|--------------|-------------------------------|-------------------------------|
| <i>HMBS</i>  | GGC AAT GCG GCT GCA A         | GGG TAC CCA CGC GAA TCA C     |
| <i>YWHAZ</i> | TGG GAA CAA GAG GGC ATC TG    | CCA CCA CTG CAT CAA ATT CAT G |
| <i>UBC</i>   | ATT TGG GTC GCG GTT CTT G     | TGC CTT GAC ATT CTC GAT GGT   |
| <i>RBM3</i>  | CIT CAG CAG TTT CGG ACC TA    | ACC ATC CAG AGA CTC TCC GT    |
| <i>CHK1</i>  | CAACTTGCTGTGAATAGAGTAACTGAAGA | ACAGTCTACGGCAGCCTTCAT         |
| <i>CHK2</i>  | GTGTGAATGACAACACTACTGGTTTGG   | TTCITTTTCAGCAGTGGTTCATC       |
| <i>MCM3</i>  | ACCAGGAATTTATCAGAGCAAAG       | CAGGTCATTCACATTGACAATCAG      |

**Table W2.** Selected Genes from the HPA for Further Validation by Western Blot in A2780 Cells.

| Gene Name        | Ab ID                    | Dilutions |
|------------------|--------------------------|-----------|
| <i>BNIP3</i>     | ABCAM 28506              | 1:600     |
| <i>HELLS/LSH</i> | SC-46665                 | 1:500     |
| <i>RSF1</i>      | Upstate 05-727           | N/A       |
| <i>SMARCC1</i>   | HPA024352                | 1:3000    |
| <i>NASP</i>      | HPA028136                | 1:250     |
| <i>NBN</i>       | HPA001429                | 1:250     |
| <i>NF2</i>       | HPA003097                | 1:250     |
| <i>ATR</i>       | SC-1887                  | 1:1000    |
| <i>WRNIP1</i>    | HPA031752                | 1:100     |
| <i>CDK2</i>      | BD                       | 1:500     |
| <i>RAD1</i>      | HPA006692                | 1:500     |
| <i>NEK11</i>     | HPA016908                | 1:1000    |
| <i>HUS1</i>      | HPA026787                | 1:100     |
| <i>CCNA2</i>     | SC-751                   | 1:500     |
| <i>CHK2</i>      | Cell Signaling no. 3440  | 1:1000    |
| <i>TERF2IP</i>   | HPA006719                | 1:100     |
| <i>POLA1</i>     | HPA002947                | 1:250     |
| <i>DKC1</i>      | HPA001022                | 1:500     |
| <i>MCM5</i>      | SEROTEC MCA1860          | N/A       |
| <i>TERF2</i>     | HPA001907                | N/A       |
| <i>UPF1</i>      | HPA019587                | N/A       |
| <i>ORC2L</i>     | Abnova H00004999-M01     | N/A       |
| <i>MSH6</i>      | HPA028376                | 1:300     |
| <i>MSH2</i>      | BD                       | 1:500     |
| <i>MCM3</i>      | HPA004789                | 1:300     |
| <i>RFC4</i>      | SC-28301                 | 1:500     |
| <i>CHK1</i>      | Cell Signaling, no. 2360 | 1:1000    |

N/A indicates not analyzed.
